# Supplementary material for: Identifying and Understanding Communities Using Twitter to Connect About Depression: Cross-Sectional Study
Source: PubMed Central journal article supplement (PMC6246977; doi:10.2196/mental.9533), 2018-11-05
Supplement: mental_v5i4e61_app1.pdf [file mental_v5i4e61_app1.pdf]

Supplementary Materials for:

**Identifying and Understanding Communities Using Twitter to Connect About Depression:  
Cross-Sectional Study**

Amber D. DeJohn, Emily E. Schulz, Amber L. Pearson, E. Megan Lachmar, Andrea K. Wittenborn

This file contains additional tables used for sensitivity analysis, which excluded Washington, D.C.

Table S1. Sensitivity analysis - regression results excluding Washington, D.C.

| Dependent variable: Tweet count  |      |                |            |
|----------------------------------|------|----------------|------------|
| Independent variables:           | IRR  | <i>p</i> value | 95% C.I.   |
| <b>% aged 15-44</b>              | 1.11 | .02            | 1.02, 1.21 |
| <b>% female</b>                  | 1.70 | <.001          | 1.25, 2.31 |
| <b>% white population</b>        | 0.99 | .34            | 0.96, 1.02 |
| <b>% single-person household</b> | 0.90 | .03            | 0.82, 0.99 |
| <b>% below poverty level</b>     | 1.05 | .30            | 0.95, 1.16 |

Table S2. Sensitivity Analysis - Community characteristics by TIVs excluding Washington, D.C.

| Community Characteristics                                           | Under-tweeting |      |      | Over-tweeting |          |                |
|---------------------------------------------------------------------|----------------|------|------|---------------|----------|----------------|
|                                                                     | TIV1           | TIV2 | TIV3 | T3:T1         | <i>r</i> | <i>P</i> value |
| <b>K12 schools per 100,000 children, mean</b>                       | 200            | 290  | 212  | 1.06          | 0.19     | .003           |
| <b>Museums rate, mean<sup>a</sup></b>                               | 17             | 33   | 20   | 1.18          | 0.20     | .002           |
| <b>% Area occupied by park, mean</b>                                | 8              | 9    | 10   | 1.25          | 0.05     | .46            |
| <b>Places of worship, mean<sup>a</sup></b>                          | 105            | 177  | 93   | 0.89          | 0.15     | .017           |
| <b>Vacant housing rate, mean<sup>a,b</sup></b>                      | 6              | 17   | 8    | 1.33          | 0.16     | .01            |
| <b>Owner-occupied housing rate, mean<sup>a,b</sup></b>              | 26             | 29   | 25   | 0.96          | 0.08     | .20            |
| <b>% active voter, mean</b>                                         | 76             | 72   | 74   | 0.97          | -0.14    | .027           |
| <b>Mental health care providers rate, mean<sup>a</sup></b>          | 209            | 157  | 293  | 1.40          | 0.09     | .17            |
| <b>Non-Profits (all) rate, mean<sup>a</sup></b>                     | 412            | 528  | 579  | 1.41          | 0.23     | <.001          |
| <b>Non-Profits (health) rate, mean<sup>a</sup></b>                  | 70             | 91   | 84   | 1.20          | 0.15     | .016           |
| <b>Non-Profits (human services) rate, mean<sup>a</sup></b>          | 147            | 184  | 195  | 1.33          | 0.23     | <.001          |
| <b>Non-Profits (public/societal benefit) rate, mean<sup>a</sup></b> | 41             | 50   | 80   | 1.95          | 0.24     | <.001          |
| <b>Non-Profits (religious) rate, mean<sup>a</sup></b>               | 12             | 14   | 17   | 1.42          | 0.12     | .057           |
| <b>Non-Profits (education) rate, mean<sup>a</sup></b>               | 76             | 85   | 97   | 1.28          | 0.13     | .039           |

<sup>a</sup>Rate per 100,000 people

<sup>b</sup>Values in thousands
