# Supplementary material for: Identifying and Understanding Communities Using Twitter to Connect About Depression: Cross-Sectional Study
Source: PubMed Central journal article supplement (PMC6246977; doi:10.2196/mental.9533), 2018-11-05
Supplement: mental_v5i4e61_app2.pdf [file mental_v5i4e61_app2.pdf]

Multimedia Appendix 2. Descriptive statistics for counties in study region, by state.

| Descriptive statistics, mean (sd) | States in study region |        |                 |        |         |         |        |         |         |        |        |        |
|-----------------------------------|------------------------|--------|-----------------|--------|---------|---------|--------|---------|---------|--------|--------|--------|
|                                   | CT                     | DE     | DC <sup>a</sup> | ME     | MD      | MA      | NH     | NJ      | NY      | PA     | RI     | VT     |
| <b>Tweet count</b>                | 0 (1)                  | 0 (1)  | 8               | 0 (0)  | 1 (1)   | 1 (2)   | 1 (1)  | 0 (1)   | 1 (4)   | 0 (1)  | 1 (1)  | 0 (0)  |
| <b>% single-person household</b>  | 18 (4)                 | 21 (3) | 24              | 16 (2) | 20 (5)  | 18 (4)  | 15 (1) | 20 (6)  | 18 (5)  | 16 (4) | 17 (4) | 16 (1) |
| <b>% below poverty level</b>      | 9 (2)                  | 13 (1) | 17              | 15 (3) | 11 (5)  | 12 (4)  | 10 (2) | 11 (5)  | 14 (4)  | 13 (3) | 11 (4) | 12 (2) |
| <b>% female</b>                   | 51 (1)                 | 52 (0) | 53              | 51 (0) | 51 (1)  | 52 (1)  | 51 (1) | 51 (0)  | 50 (1)  | 50 (2) | 52 (0) | 50 (1) |
| <b>% by population aged 15-44</b> | 39 (3)                 | 38 (5) | 52              | 35 (3) | 39 (4)  | 39 (6)  | 37 (4) | 39 (4)  | 39 (4)  | 37 (4) | 38 (3) | 36 (4) |
| <b>% white population</b>         | 83 (8)                 | 71 (7) | 40              | 96 (2) | 72 (19) | 84 (10) | 95 (2) | 73 (14) | 86 (14) | 92 (9) | 89 (9) | 96 (1) |

<sup>a</sup>DC is a single observation, therefore mean and sd were not calculated.
